# Supplementary material for: A Trans-Species Missense SNP in Amhr2 Is Associated with Sex Determination in the Tiger Pufferfish, Takifugu rubripes (Fugu)
Source: PLoS Genet. 2012 Jul 12;8(7):e1002798. doi: 10.1371/journal.pgen.1002798 (PMC3395601; doi:10.1371/journal.pgen.1002798)
Supplement: Table S5 — Primer sequences. (XLS) [file pgen.1002798.s009.xls]

## Sheet: Sheet1
	Table S5. Primer sequences
	Name	Purpose	Orientation	Sequence (5’-3’）
	f540F*	microsatellite locus analysis	F	CCGCGTTTACCAGGGGGAGTTTA
	f540R*	microsatellite locus analysis	R	TTTTTACCGTGTCTTCGCCATCAA
	1189kF	microsatellite locus analysis	F	ATCCATTAAAACCCGGGAAG
	1189kR	microsatellite locus analysis	R	GCCATGACGTCTGCATACAA
	1281kF	microsatellite locus analysis	F	TGCCAAGCACACTTTCAGAC
	1281kR	microsatellite locus analysis	R	TTCTCGAGTGCACATTCCTG
	1349kF	microsatellite locus analysis	F	CGCCCAGTAAAATGTCCCTA
	1349kR	microsatellite locus analysis	R	TCTTTTCCTGCTGCTCAGGT
	1396kF	microsatellite locus analysis	F	GTGAGATGGACGTGCAAATG
	1396kR	microsatellite locus analysis	R	TGTGGATATCAGTGGTGCTCA
	1454kF	microsatellite locus analysis	F	TTCAACCGAGGTTACGGTTC
	1454kR	microsatellite locus analysis	R	GATTGAGGCCTGAAACCTGA
	1469kF	microsatellite locus analysis	F	GGCCACATTTCCTTCTTCAA
	1469kR	microsatellite locus analysis	R	AGCGACCAGGTGAGTGTCTAA
	1472kF	microsatellite locus analysis	F	ATCCTTACAACCGTGCCAAG
	1472kR	microsatellite locus analysis	R	TGCGTGAAAACTCCATTGAC
	1482kF	microsatellite locus analysis	F	CCAAGAGCCAAAGAGTCCAT
	1482kR	microsatellite locus analysis	R	GCTTGCTCATTGTGTGTGCT
	1499kF	microsatellite locus analysis	F	GCTCAAAACCAGAGGCTGTT
	1499kR	microsatellite locus analysis	R	CATCTCTTTGCCCCAGGATA
	1522kF	microsatellite locus analysis	F	GTGGGAATACCCCACAAAGA
	1522kR	microsatellite locus analysis	R	GCTCCCTTACATCGGATTTTC
	1687kF	microsatellite locus analysis	F	TCAGCTGGTTGTGAACTGAAA
	1687kR	microsatellite locus analysis	R	ATTGCATTCGGTTGTTGATG
	sca77F	microsatellite locus analysis	F	CCGTGTTCAAACATGTCCAG
	sca77R	microsatellite locus analysis	R	AGGGCTTCAGAACAGAGTGC
	scaff77-2F	microsatellite locus analysis	F	CCACTGTCCCTGGGCTACAAT
	scaff77-2R	microsatellite locus analysis	R	TGCCAATATCCAATCTTCCA
	scaff77-3F	microsatellite locus analysis	F	GTTCCAAAGGAACAGGTGGA
	scaff77-3R	microsatellite locus analysis	R	GGCCTTCTGGATGATTTTGA
	f383F	microsatellite locus analysis	F	ATAGCCGGTGTCCGTCATAC
	f383R	microsatellite locus analysis	R	CCTTTGATTGTCCAAACACG
	f542F	microsatellite locus analysis	F	CCTTCAGGCGTGGATGTTAT
	f542R	microsatellite locus analysis	R	CCTTAAGACAATACACAGGCAGA
	f301F	microsatellite locus analysis	F	TTACCAGACGGCGGCAGTG
	f301R	microsatellite locus analysis	R	TTGGGAACGTTATAGTGAGTGGAT
	f58F*	microsatellite locus analysis	F	CCTCACACGGCGGATCAGAACAGA
	f58R*	microsatellite locus analysis	R	GCTATCAGTGCCGCCAGGTCCAG
	f70F*	microsatellite locus analysis	F	GCACTTCTGCAGTGTCATCC
	f70R*	microsatellite locus analysis	R	TGCTCCTCTTCACCCTTTTC
	f67F*	microsatellite locus analysis	F	TGCATAATTTGCATGCCTGT
	f67R*	microsatellite locus analysis	R	TCCCGATAAACCAACACAGA
	f302F	microsatellite locus analysis	F	TAAACCCAAGTCTGACCTGAACCT
	f302R	microsatellite locus analysis	R	AATCTTTGCCCCCTGCTGTG
	f540F	microsatellite locus analysis	F	CCGCGTTTACCAGGGGGAGTTTA
	f540R	microsatellite locus analysis	R	TTTTTACCGTGTCTTCGCCATCAA
	SD2-14.7kF	long PCR	F	AGGGTGACTAAGACCAACATTTCCTTC
	SD2-14.7kR	long PCR	R	CGAGGTGTCTTTATCTCCAGTCTTTCA
	33-1464k340F	long PCR	F	CTTCTCCAGTCTTTACCAGGAGTTTTACTT
	33-1464k13469R	long PCR	R	GCTCACAGAACCCTTCTCCTTTGTCTT
	33-1464k8070R	long PCR	R	GGCACGGTTGTAAGGATTTACAATACA
	33-1464k7059F	long PCR	F	TACAGCTAAGCAGTTGCCACACAAATA
	sca33-1475634F	SNP typing	F	CCCACAGCTAAAGTCAGCAA
	sca33-1475634R	SNP typing	R	CCAAGCTCAGCTCCAGTTCT
	sca33-1458078F	SNP typing	F	AAGATGGGGCTCCCTTATGT
	sca33-1458078R	SNP typing	R	CTGTTCTGGTGGCTTTTTCC
	SD3exon8F	sequencing	F	CAGATGCACACAAACCACCT
	SD3exon10R	sequencing	R	TCCCAGTGTTGCGGTATGTA
	Tet-SD3exon8F	sequencing	F	GTCCTGCGTTCTTCTTCAGG
	Tet-SD3exon10R	sequencing	R	CATATGGCAGCTGATGCTGT
	RT-SD3exon9F	RT-PCR	F	AACGAGCCCGTTGAACCT
	RT-SD3exon9R	RT-PCR	R	TCACCGCCGTGACTGAA
	EF1a-F	RT-PCR	F	TCTCAGATGGGGAAGGGCTCGTT
	EF1a-R	RT-PCR	R	GGTCTGACCGTTCTTAGAGATGCCCGCCTC
	hAMHRII-F	cDNA cloning	F	AAAGGTACCATGCTAGGGTCTTTGGGGCTT
	hAMHRII-R	cDNA cloning	R	AAATCTAGAACAGGAGAAAGGGTACAGG
	hAMHRII-D397H-F	site directed mutagenesis	F	ACTCTGCACCTACAGGATTGGGGCATGG
	hAMHRII-D397H-R	site directed mutagenesis	R	CTTGTCCAAGAGCTCTGGTGCCATGTA
	Smad1f	cDNA cloning	F	GGGGGATCCGTAATGTGACAAGTTTATTTTC
	Smad1r	cDNA cloning	R	TTTGCGGCCGCTCAAGATACAGATGAAATAG
	*The markers have been described previously in Kikuchi et al. (8) or Kai et al. (10).
